# Supplementary material
Source: PubMed Central journal article supplement (PMC2781612)
Supplement: supp_M109.049619_jbc.M109.049619-1.pdf [file supp_M109.049619_jbc.M109.049619-1.pdf]

## Supplementary Figure Legends

Figure 1. (A) Expression of p63, Smad7, Bmp7 and Bmp6 mRNA was determined by in situ hybridization in newborn mouse skin at P1. Frozen sections were hybridized with digoxigenin-labeled antisense probes. Corresponding sense cRNAs were used as control. The dashed lines indicate the dermal–epidermal junction. Scale bar 60µm. (B) In situ hybridization of Bmp7 mRNA was performed on frozen sections of p63 null (KO) and wild-type (WT) embryos at E14.5. Scale bar 50µM. (C) The predicted p63-binding hemi-sites located at +2.4Kb from the Bmp7 TSS are indicated with their nucleotide sequence and phylogenetic conservation in multiple species (Left panel). Bold nucleotides correspond to the core nucleotide sequence required for p63-binding, while underlined nucleotides are matches in the consensus sequence. ChIP followed by real time PCR (right panel) was performed as described in Fig. 3B.

Figure 2. (A) Keratinocytes were transfected with p63, Smad7 and ctr siRNA, and the indicated proteins were detected by immunoblotting. (B) Keratinocytes were transfected with pBABE-Smad7 (Smad7) or with an empty pBABE vector (ctr) and the indicated reporters. Luciferase activity was measured 48 hrs after transfection as described in Figure 1. (C) Krt8 expression was suppressed by two unrelated Smad7 siRNA oligonucleotides (S7 and S7\_2) in the absence of p63, confirming Smad7 siRNA specificity. (D) mRNA expression of Lce1a2 and Lce1d was measured by real time RT-PCR in primary keratinocytes transfected with p63, Smad7, p63 and Smad7 (p63/S7), or ctr siRNA 48 hrs after transfection. Cells were either treated with BMP7 for the last 24 hrs or left untreated. Values are normalized for Gapdh expression.

Figure 3. Smad1 (A) and Smad5 (B) expression levels were measured by real time RT-PCR in primary keratinocytes transfected with two unrelated Smad1 (S1\_a and S1\_b), two unrelated Smad5 (S5\_a and S5\_b), or ctr siRNA. Values are normalized for β-actin expression. (C) Id1 expression was measured by real time RT-PCR in primary mouse keratinocytes transfected with siRNA for ctr, Smad1 (S1\_a), Smad5 (S5\_a), or both Smad1 and Smad5.

## Supplementary Materials and Methods

The following primary antibodies were used for immunofluorescence staining: p63 (4A4, Santa Cruz Biotechnology), Krt8 (Troma-1 rat monoclonal antibody developed by Rolf Kemler, obtained from the Developmental Studies Hybridoma Bank at The University of Iowa), Cldn7 (34-9100, Invitrogen), Cldn 3 (34-1700, Invitrogen), Cdh1 (610181, BD Biosciences) for paraffin-embedded tissue, Cdh1 (13-1900, Invitrogen) for frozen-embedded tissue, phospho-Smad1/5/8 (9511, Cell Signaling), Smad1 (sc-7965, Santa Cruz), phospho-Smad2 (3108, Cell Signaling), Smad2 (3103, Cell Signaling). Alexa Fluor® secondary antibodies (Invitrogen) were used for detection. The following primary antibodies were used for immunoblotting analysis in addition to the ones listed above: Smad7 (MAB2029, R&D Systems), polyclonal anti-Bex1 (a gift from Frank Margolis), ERK-1/2 (K-23, Santa Cruz Biotechnology), β-actin (AC-15 Sigma). The following secondary antibodies were used for immunofluorescence staining: Alexa Fluor® 488 goat anti-mouse (Invitrogen), Alexa Fluor® 594 goat anti-rabbit (Invitrogen), Alexa Fluor® 594 goat anti-rat (Invitrogen).

# Suppl. Figure 1

A

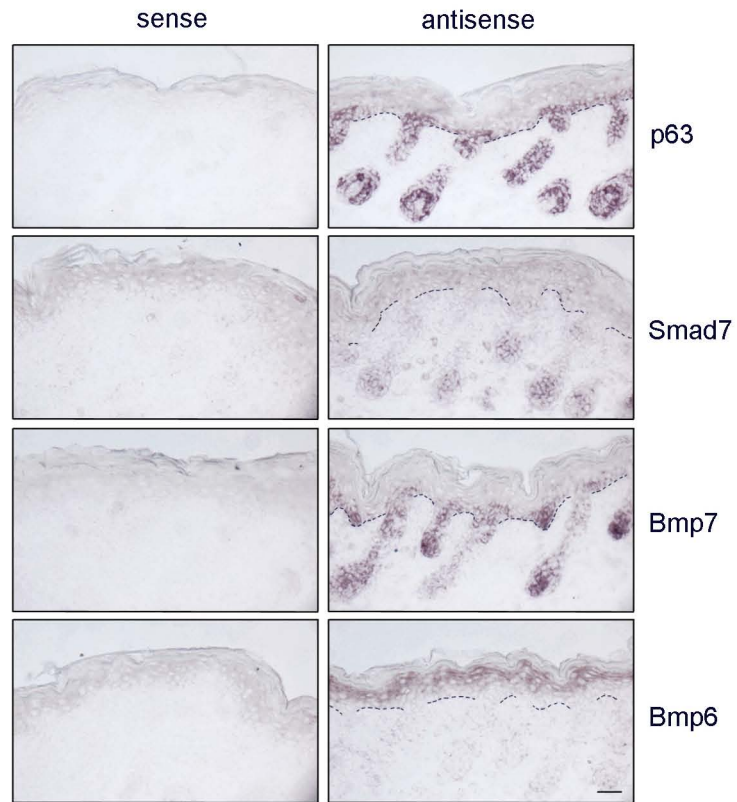

B

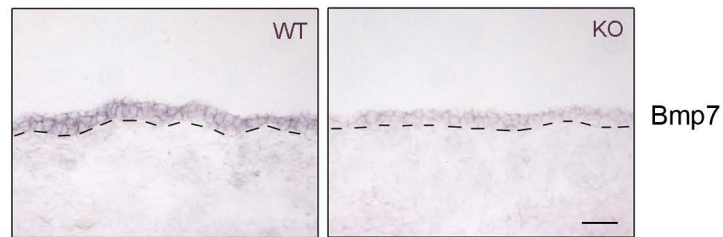

C

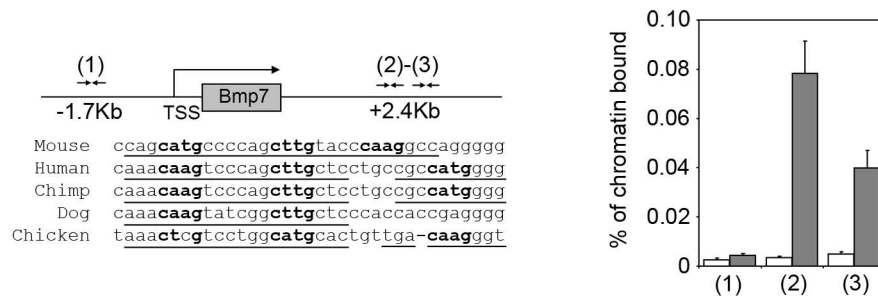

# Suppl. Figure 2

A

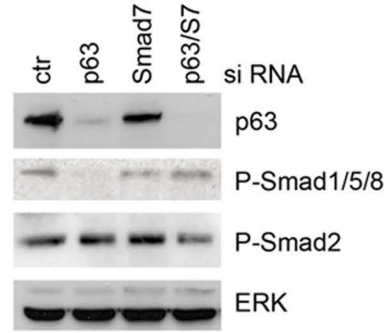

B

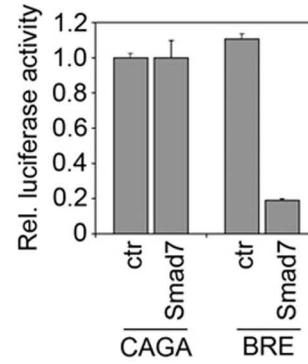

C

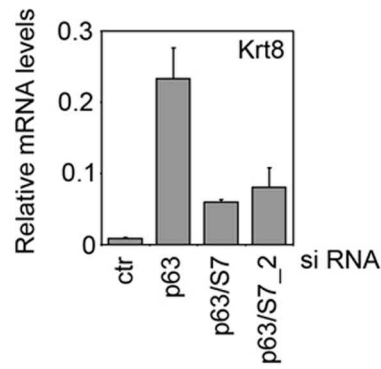

D

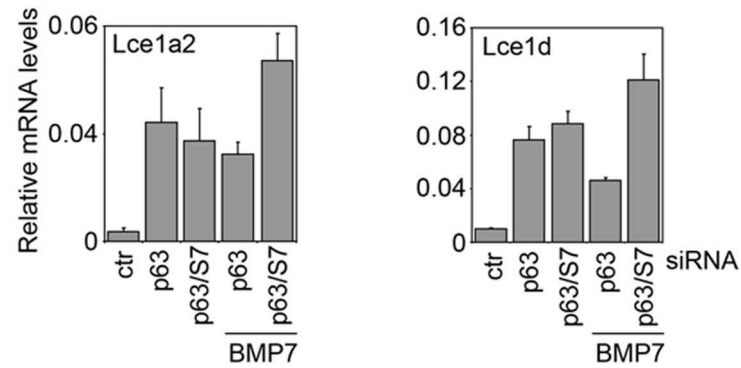

# Suppl. Figure 3

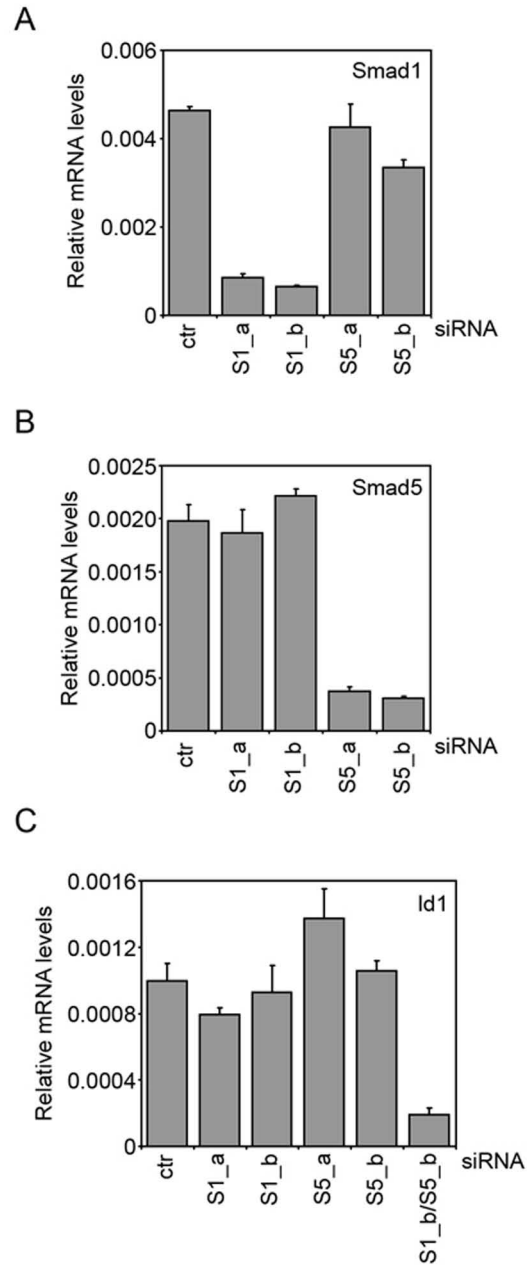

**Table S1. Genes induced by p63 knockdown.**

| Probe Set ID | Gene Symbol   | p63KD/ctr | FDR   | GNF expression <sup>a</sup>                                                    |
|--------------|---------------|-----------|-------|--------------------------------------------------------------------------------|
| 1451287_s_at | 2810003C17Rik | 9.6       | 0.142 | U <sup>b</sup>                                                                 |
| 1436344_at   | 5830404H04Rik | 6.0       | 0.039 | ND <sup>c</sup>                                                                |
| 1424838_at   | A330049M08Rik | 5.8       | 0.044 | trigeminal                                                                     |
| 1455180_at   | AA407270      | 7.3       | 0.024 | ND                                                                             |
| 1422925_s_at | Acot3         | 6.8       | 0.094 | liver, kidney                                                                  |
| 1427735_a_at | Acta1         | 5.6       | 0.090 | skeletal muscle, epidermis, snout epidermis, tongue, prostate, bone, brown fat |
| 1421172_at   | Adam12        | 5.5       | 0.132 | U                                                                              |
| 1450065_at   | Adcy7         | 6.4       | 0.040 | B cells, CD8+ positive cells                                                   |
| 1454890_at   | Amot          | 5.0       | 0.174 | placenta, embryo day E6.5                                                      |
| 1450325_at   | Angpt4        | 5.4       | 0.248 | snout epidermis                                                                |
| 1420991_at   | Ankrd1        | 10        | 0.234 | heart, umbilical cord                                                          |
| 1418858_at   | Aox3          | 8.9       | 0.068 | liver, lung, trachea                                                           |
| 1455826_a_at | Bace1         | 7.4       | 0.155 | U                                                                              |
| 1448595_a_at | Bex1          | 8.2       | 0.055 | embryo E6.5, E7.5, E8.5                                                        |
| 1448752_at   | Car2          | 18.1      | 0.031 | stomach, bone marrow, bone                                                     |
| 1419609_at   | Ccr1          | 6.4       | 0.076 | U                                                                              |
| 1460569_x_at | Cldn3         | 17.5      | 0.039 | intestin, prostate, blastocyst                                                 |
| 1448393_at   | Cldn7         | 7.4       | 0.145 | small intestin, large intestin, blastocysts, uterus                            |
| 1437689_x_at | Clu           | 22.0      | 0.028 | bladder, liver, stomach, lymphonode, mammary gland, brain                      |
| 1419872_at   | Csf1r         | 5.2       | 0.051 | U                                                                              |
| 1415803_at   | Cx3cl1        | 6.0       | 0.178 | cortex, dorsal striatum, olfactory bulb                                        |

|              |          |      |       |                                                                       |
|--------------|----------|------|-------|-----------------------------------------------------------------------|
| 1450839_at   | D0H4S114 | 5.3  | 0.152 | cerebellum                                                            |
| 1427289_at   | Ddhd1    | 6.4  | 0.091 | testis, ovary, trachea, small intestine, brain                        |
| 1448619_at   | Dhcr7    | 6.8  | 0.011 | adrenal gland, snout epidermis                                        |
| 1418937_at   | Dio2     | 7.9  | 0.068 | uterus, brown fat                                                     |
| 1451270_at   | Dusp18   | 5.6  | 0.159 | U                                                                     |
| 1417023_a_at | Fabp4    | 5.0  | 0.113 | brown fat, adipose tissue, ovary                                      |
| 1424647_at   | Gabrp    | 5.7  | 0.025 | trachea                                                               |
| 1437618_x_at | Gpr85    | 6.1  | 0.198 | brain                                                                 |
| 1436917_s_at | Gpsm1    | 5.6  | 0.232 | olfactory bulb, heart                                                 |
| 1424553_at   | Hhatl    | 5.9  | 0.181 | heart, skeletal muscle                                                |
| 1418352_at   | Hsd17b2  | 12.7 | 0.023 | large intestine, liver, placenta                                      |
| 1427029_at   | Htra3    | 10.1 | 0.037 | epidermis, snout epidermis, digits, placenta, adipose tissue          |
| 1417141_at   | Igtp     | 5.4  | 0.132 | CD4+ cells                                                            |
| 1435945_a_at | Kcnn4    | 7.1  | 0.100 | CD4+ cells, CD8+ cells, thyroid                                       |
| 1448169_at   | Krt18    | 17.0 | 0.058 | blastocyst, placenta (stomach, large intestine)                       |
| 1423691_x_at | Krt8     | 34.1 | 0.103 | large intestine, blastocyst, stomach, small intestine                 |
| 1420350_at   | Lce1a2   | 6.7  | 0.249 | digits, epidermis, snout epidermis, tongue                            |
| 1419409_at   | Lce1b    | 6.7  | 0.207 | digits, epidermis, snout epidermis, tongue                            |
| 1420332_x_at | Lce1d    | 5.1  | 0.210 | digits, snout epidermis, tongue                                       |
| 1421316_at   | Lce1g    | 16.2 | 0.118 | epidermis, digits, pancreas                                           |
| 1449959_x_at | Lce1h    | 6.3  | 0.148 | digits, snout epidermis, tongue                                       |
| 1417275_at   | Mal      | 5.8  | 0.030 | substantia nigra, eye, spinal cord, bladder, stomach, umbilical, cord |
| 1430837_a_at | Mbd1     | 7.9  | 0.242 | U                                                                     |
| 1417256_at   | Mmp13    | 5.9  | 0.096 | vomero nasal epithelium, bone                                         |
| 1460238_at   | Msln     | 16.4 | 0.028 | umbilical cord, trachea (pleura)                                      |

|              |                 |      |       |                                                                                                    |
|--------------|-----------------|------|-------|----------------------------------------------------------------------------------------------------|
| 1416808_at   | Nid1            | 5.5  | 0.048 | adipose tissue, blastocyst                                                                         |
| 1419665_a_at | Nupr1           | 5.7  | 0.012 | pancreas, thyroid, salivary gland, vomeronasal olfactory epithelium                                |
| 1426562_a_at | Olfm1           | 5.2  | 0.184 | frontal cortex, cerebral cortex, hyppocampus, amygdala, dorsal striatum, bulb olfactory epithelium |
| 1436851_at   | Pkn1 /// Ptger1 | 7.5  | 0.024 | B-cells                                                                                            |
| 1452517_at   | Plekhh1         | 6.3  | 0.071 | placenta, blastocyst                                                                               |
| 1419700_a_at | Prom1           | 5.6  | 0.049 | eye, uterus, large intestin, vomero nasal                                                          |
| 1420352_at   | Prss22          | 5.9  | 0.170 | ND                                                                                                 |
| 1451258_at   | Psca            | 6.3  | 0.121 | bladder, stomach                                                                                   |
| 1436448_a_at | Ptgs1           | 5.1  | 0.061 | bladder, epidermis, digits                                                                         |
| 1422324_a_at | Pthlh           | 5.2  | 0.020 | snout epidermis, vomeronasal epithelium                                                            |
| 1451452_a_at | Rgs16           | 11.2 | 0.199 | mammary gland                                                                                      |
| 1427020_at   | Scara3          | 10.9 | 0.035 | trachea, digits, main olfactory epithelium                                                         |
| 1450956_at   | Scd3            | 6.5  | 0.050 | eye, epidermis                                                                                     |
| 1437052_s_at | Slc2a3          | 20.1 | 0.024 | blastocyst, embryo E6.5, E7.5, E8.5, testis                                                        |
| 1450032_at   | Slco2a1         | 10.1 | 0.070 | placenta                                                                                           |
| 1420562_at   | Slurp1          | 6.9  | 0.173 | ND                                                                                                 |
| 1436790_a_at | Sox11           | 8.5  | 0.129 | embryo E9.5, E10.5                                                                                 |
| 1451601_a_at | Spns2           | 7.1  | 0.077 | U                                                                                                  |
| 1420377_at   | St8sia2         | 10.5 | 0.034 | U                                                                                                  |
| 1439567_at   | Tbx3            | 9.8  | 0.132 | adrenal gland, prostate, stomach, lung                                                             |
| 1417455_at   | Tgfb3           | 13.8 | 0.034 | mammary gland, umbilical cord                                                                      |
| 1417455_at   | Tgfb3           | 14   | 0.034 | mammary gland, umbilical cord                                                                      |
| 1450040_at   | Timp2           | 11.0 | 0.050 | U                                                                                                  |
| 1419089_at   | Timp3           | 5.0  | 0.038 | adrenal gland, kidney                                                                              |
| 1419154_at   | Tmprss2         | 5.6  | 0.025 | bladder                                                                                            |

|              |         |     |       |                                             |
|--------------|---------|-----|-------|---------------------------------------------|
| 1438855_x_at | Tnfaip2 | 5.5 | 0.030 | bladder, bone marrow, embryo, spleen, liver |
| 1455812_x_at | Vasn    | 5.6 | 0.035 | ND                                          |

<sup>a</sup> See Supplementary Material and Methods for GNF expression

<sup>b</sup> U: ubiquitous

<sup>c</sup> ND: not determined



**Table S2. Oligonucleotide primer used in this study.**

| <u>Oligonucleotide Primers for Real Time RT-PCR</u> |                                                      | <u>Oligonucleotide Primers for ChIP</u>                |                                                  |
|-----------------------------------------------------|------------------------------------------------------|--------------------------------------------------------|--------------------------------------------------|
| Gapdh                                               | GTATGACTCCACTCACGGCAAA<br>TTCCCATCTCGGCCTTG          | Smad7 ctr (-0.2kb)                                     | GCGAAACACAATCGCTTTTTT<br>CGTCACGTGGCCGTCTAGA     |
| Actb                                                | CTAAGGCCAACCGTAAAAAGAT<br>GCCTGGATGGCTACGTACATG      | Smad7 (2) (-2.7kb)                                     | ATCTGTTTTTACCCGGGCCT<br>CGTGAGTGGTCTAATCCCCT     |
| p63                                                 | CATGAGCTGAGCCGTGAGTTC<br>GGCTGTTCCCTTCTACTCGAA       | Smad7 (1) (-3.1kb)                                     | GTGAGGCGAAAGAAGAGCCC<br>GCTCTGACTGGCTTGATGCC     |
| Krt14                                               | TGACGTCTCCACCCACCTG<br>ACCACGAGGAGGAAATGGC           | Bmp7 (1) (-1.7kb)                                      | TGCTGTGGTGGGTGATCTGA<br>GTCATGTCTCCAGCTCGCAG     |
| Krt8                                                | TGCTCATGTTCTGCATCCCA<br>GATCACCACTACCGCAAGC          | Bmp7 (2) (+2.2kb)                                      | AGGCAAGCGCTGAATTGT<br>TGTGATCTCCAGCAAGGCAGT      |
| Cldn7                                               | ACAGGAGCAAGAGAGCAGGG<br>CTGCCATCTTATCGGCTGG          | Bmp7 (3) (+2.5kb)                                      | CCTCGCTGATTGAGAGGCTC<br>TCATGTTGAAAGGACAAAGCCTAG |
| Tmprss2                                             | CCTACATACAGACTAAATGTGCAA<br>GAAATAACCAACCAACAGCAAAGA |                                                        |                                                  |
| Bex1                                                | TGACCACCATGATGAGTTTTGC<br>TCCCATGTCATCTTCAGAGAA      | <u>siRNA oligonucleotides</u>                          |                                                  |
| Smad6                                               | GGCTGTCTCCTCCTGACCAGTA<br>CAATGTAGAATCGGACAGATCCAG   | Smad7                                                  | AGTCAAGAGGCTGTGTTGCTGTGAA                        |
| Smad7                                               | GAAGGTGGTGCCACTTTCA<br>AACGAGAGTCAGCACTGCCA          | Smad7_2                                                | CCCATCACCTTAGTCGACTCTGTGA                        |
| Bmp7                                                | CATCGTCCAGACTGGTTCA<br>AGCAGGGCTTGGGTACTGTG          | Smad1_a                                                | CATATTGGGAAAGGAGTCCACCTTT                        |
| Bmp2                                                | GGCCGTTTTCCCACTCATCT<br>CCATCACGAAGAAGCCGTG          | Smad1_b                                                | CAATCCTATTTTCATCCGTGCTTAA                        |
| Bmp4                                                | TGAGGAGTTTCCATCACGAAGAA<br>CACTGGTCCCTGGGATGTTT      | Smad5_a                                                | CAGAGATGTTGAGCCTGTCGCTAT                         |
| Bmp6                                                | TGTCCAACAAAAATAGGTCAGAGT<br>AAGTCTTGCAAGGAGCATCAGC   | Smad5_b                                                | ATTCATAGTAGACAATCGAACACCA                        |
| Lce1d                                               | TCGTCTTGCTCCAGAGCACTCACC<br>GGAGGCTGGCACTGCTGTTGG    | Bmp7_a                                                 | CCTGAAGGCTATGCTGCCTACTACT                        |
| Lce1a2                                              | GTTCTGCTGGCAGGACATCT<br>GCCCAAGGATCTTGTACTGC         | Bmp7_b                                                 | CAACCTAGTGAACATGACAAAGAA                         |
| Id1                                                 | GAGCAGCAGGTGAACGTCCT<br>TCCTTGAGGCGTGAGTAGCA         |                                                        |                                                  |
| Id2                                                 | TGATGCAGGCTGACGATAGTG<br>TCTTGGACCTGCAGATCGC         | <u>Cloning of Bmp7 probe for in situ hybridization</u> |                                                  |
| Smad1                                               | ATTGAAAACACCAGGCGACATA<br>CCAACGTAATAAAGGTGGACTCCT   |                                                        | TCTTCCACCCTCGATACCAC<br>CCGGATACTACGGAGATGGA     |
| Smad5                                               | ACTATTGAAAACACTAGGCGGCATA<br>CACCTCCCCACCAACGTAGTA   | <u>Mutagenesis of Smad7 promoter</u>                   |                                                  |
|                                                     |                                                      | Mut 166-167                                            | GAATTAACACCCACAATTACCCGATGGGAACATAGCTCTG         |
|                                                     |                                                      | Mut 187-188                                            | GGGAACATAGCTCTGCCCGTAGATGCACGTCCC                |
|                                                     |                                                      | Mut 212-213                                            | GCACGTCCCATCCAGACCCGCTGTGACATCAGATTC             |
